# Supplementary material for: Genome‐scale phylogeography resolves the native population structure of the Asian longhorned beetle, Anoplophora glabripennis (Motschulsky)
Source: PubMed Central journal article supplement (PMC9234632; doi:10.1111/eva.13381), 2022-06-07
Supplement: EVA-15-934-s002.pdf [file EVA-15-934-s002.pdf]

## Supplementary Figures

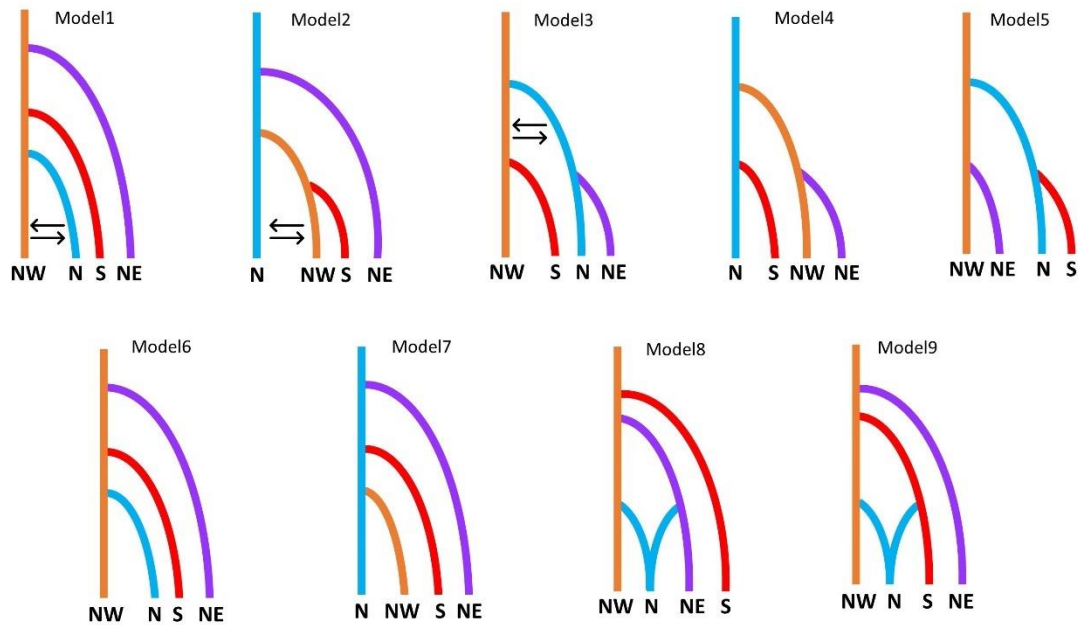

**Figure S1** Nine demographic models tested in Migrade. 422 SNPs shared by 80 samples were used in the analysis of four groups identified by the PCA, *i.e.*, Northwest (NW, orange), North (N, turquoise), South (S, red) and Northeast (NE, purple). Gene-flow is indicated by arrows. The divergence times between groups were not tested here.

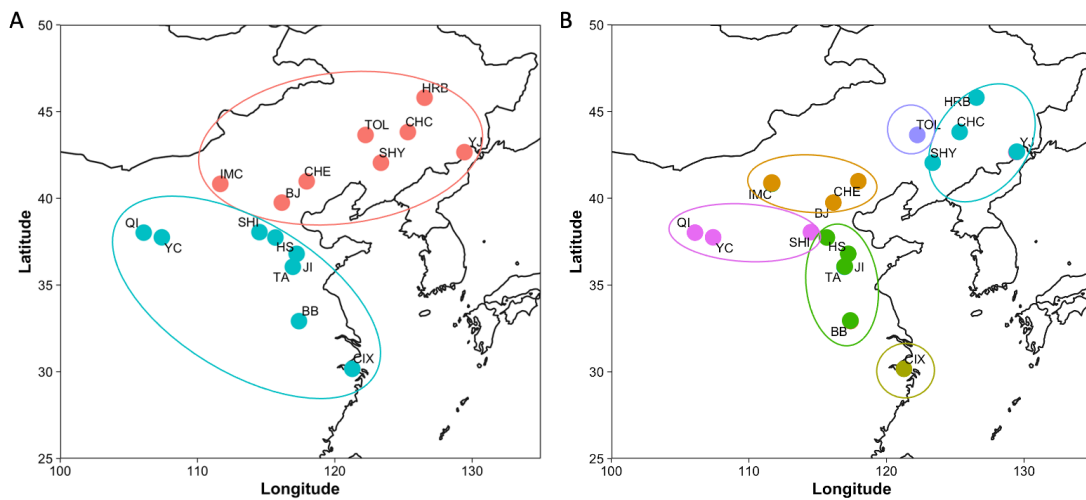

**Figure S2** Grouping map. **A** Two groups based on sPCA results. **B** Six groups according to groups identified by DAPCs. For population codes, see Table 1.

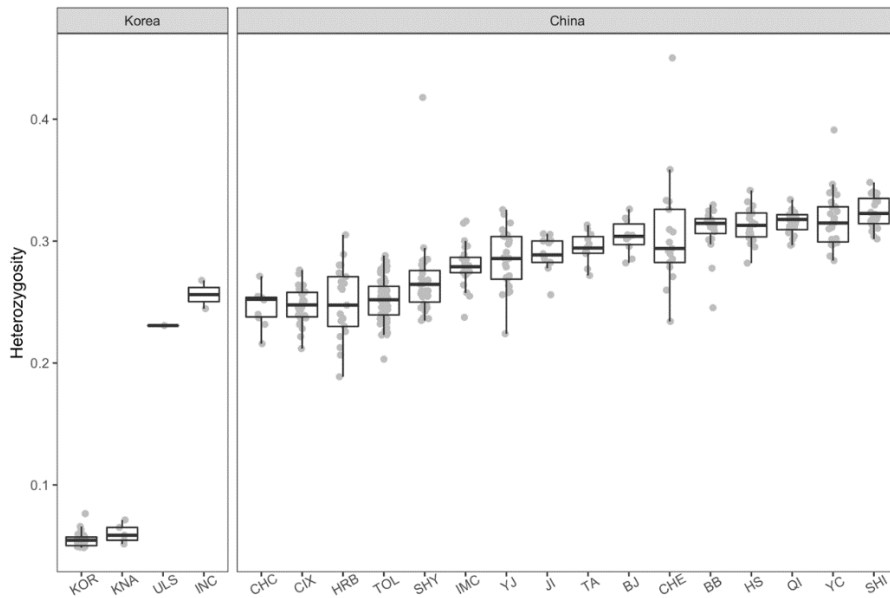

**Figure S3** Observed heterozygosity plot for ALB individuals. Each dot represents an individual. The information for sampling site is shown in Table 1. Populations are ordered by mean values in ascending order. A total of 6,102 SNPs were used in the analysis.

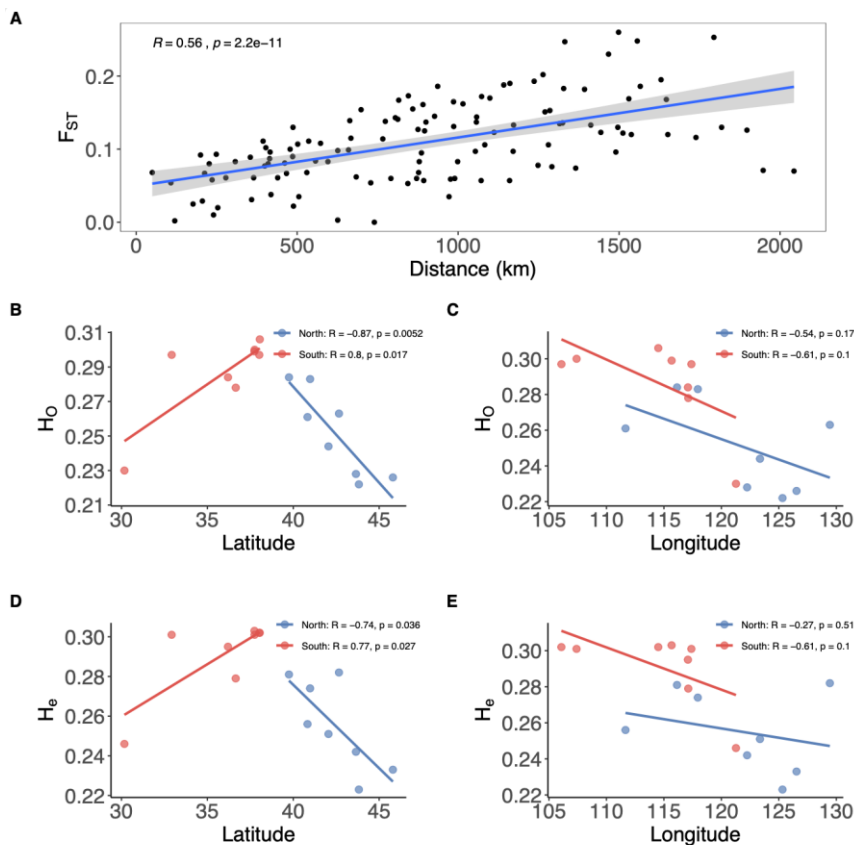

**Figure S4** A Isolation-by-distance shown as pairwise  $F_{ST}$  between populations against geographical distances. **B, C** Relationships between observed heterozygosity and latitude/longitude. **D, E** Relationships between expected heterozygosity and latitude/longitude. The eight populations in the north identified by sPCA are colour-coded in blue and the other eight populations in the south in red. Colour-coded lines are the trend lines. Pearson correlation coefficient and  $P$ -value are presented on the top right of each graph.

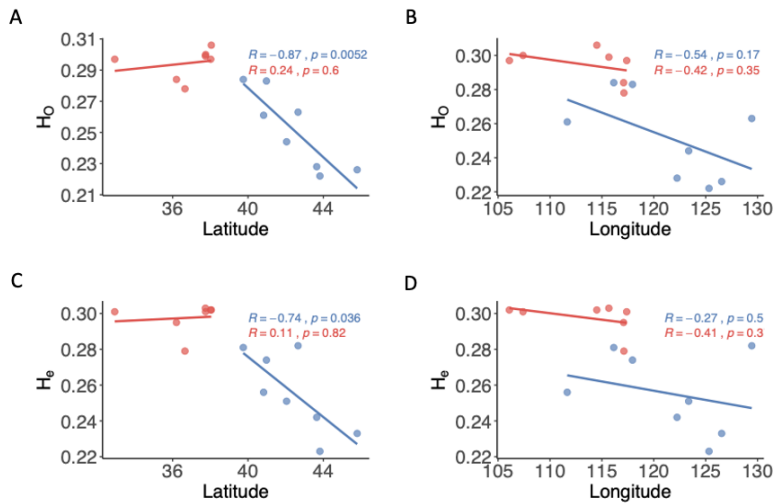

**Figure S5** **A, B** Relationships between observed heterozygosity and latitude/longitude excluding population CIX. **C, D** Relationships between expected heterozygosity and latitude/longitude excluding CIX. The eight populations in the north identified by sPCA are colour-coded in blue and the other eight populations in the south in red. Colour-coded lines are the trend lines. Pearson correlation coefficient and *P*-value are presented on the top right of each graph.

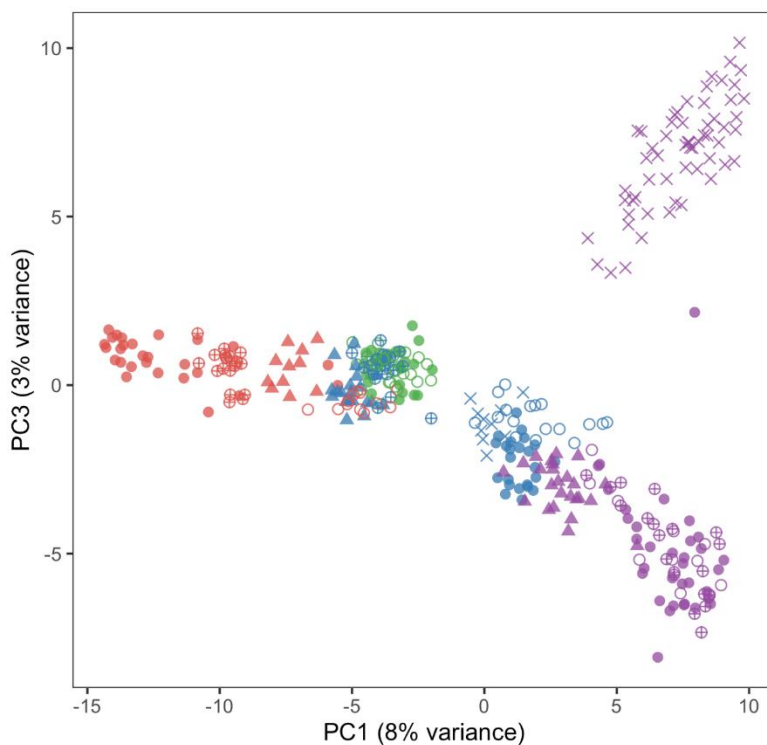

**Figure S6** PCA analysis of the ALB populations in China. PC1 and PC3 explained 8% and 3% of the genetic variance, respectively. A total of 6,102 SNPs were involved in the analysis. For population colours and shapes, refer to Figure 2A.

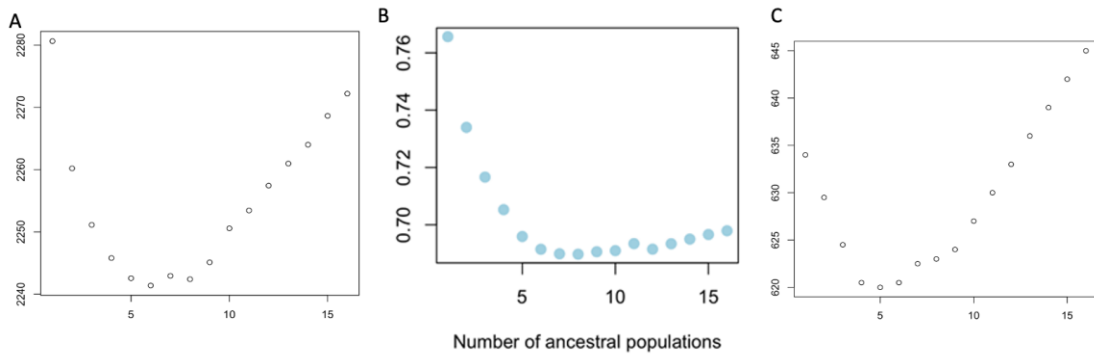

**Figure S7** **A** Bayesian Information Criterion (BIC) for the SNP dataset used in the DAPC analysis. The x-axis indicates the number of clusters and the y-axis shows the BIC values. **B** The cross-entropy criterion (y-axis) for the respective number of ancestral populations (x-axis) as identified in the LEA analysis (SNP marker analysis only). **C** BIC for the microsatellite dataset used in the DAPC.

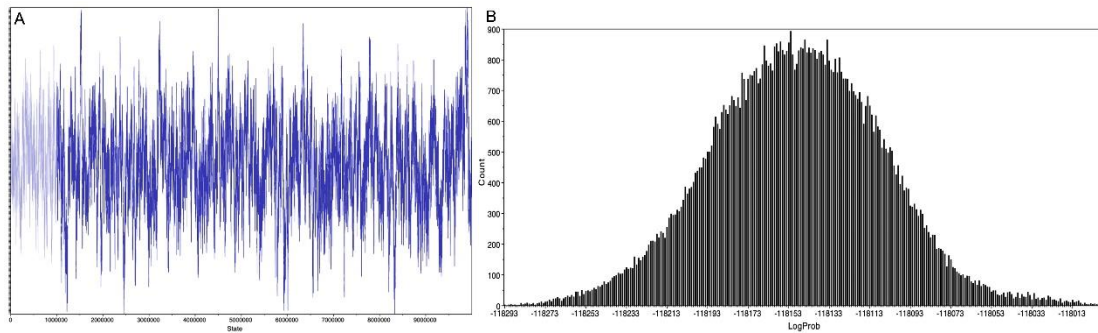

**Figure S8** Trace file visualization of BayesAss results. **A** Trace plot of BayesAss analysis. **B** Posterior probability distribution.

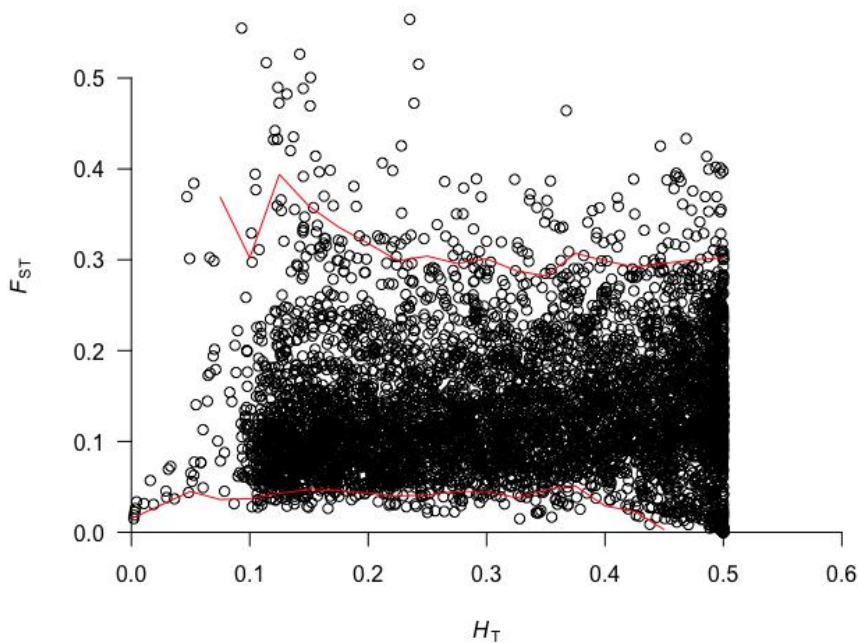

**Figure S9** Heterozygosity ( $H_T$ )- $F_{ST}$  relationship with smoothed quantiles in *fsthet*. Loci lying outside the quantiles were identified as outliers putatively under (positive or balancing) selection as determined under confidence intervals of 95% (red lines). The mean  $F_{ST}$  across all 6,102 loci is  $0.134 \pm 0.002$ .

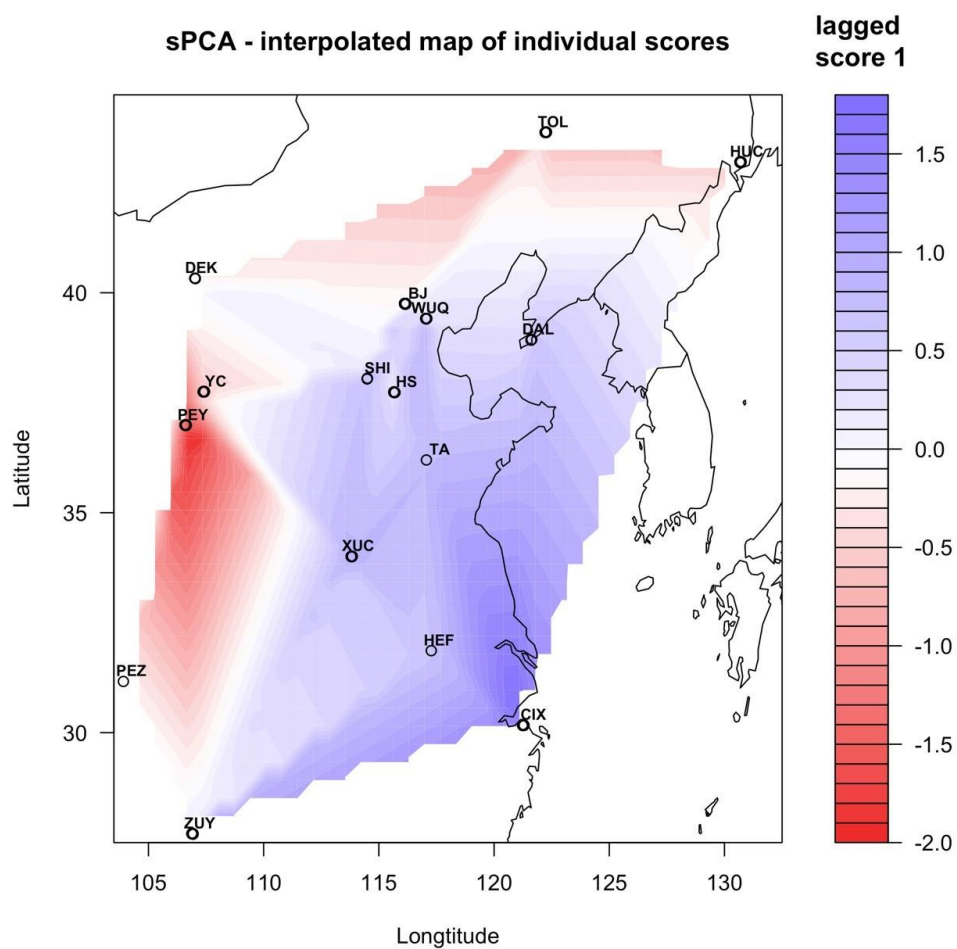

**Figure S10** The sPCA analysis for the microsatellite dataset. The name codes for the populations are given in Table S3

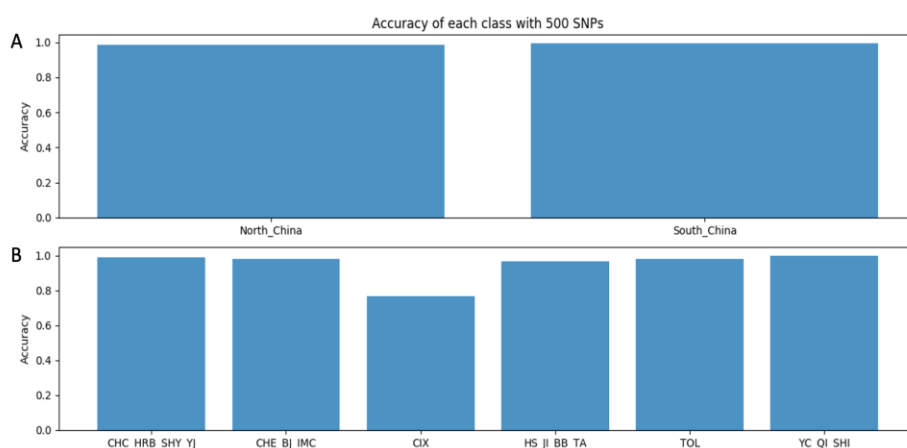

**Figure S11** Assignment accuracy for each population assignment class in Mycorrhiza based on the most discriminant 500 SNPs (after testing the whole dataset of 6,102 SNPs). **A** ALB population divided into two groups (sPCA informed). **B** ALB populations divided into six groups (DAPC informed). Grouping information as in Figure S2.

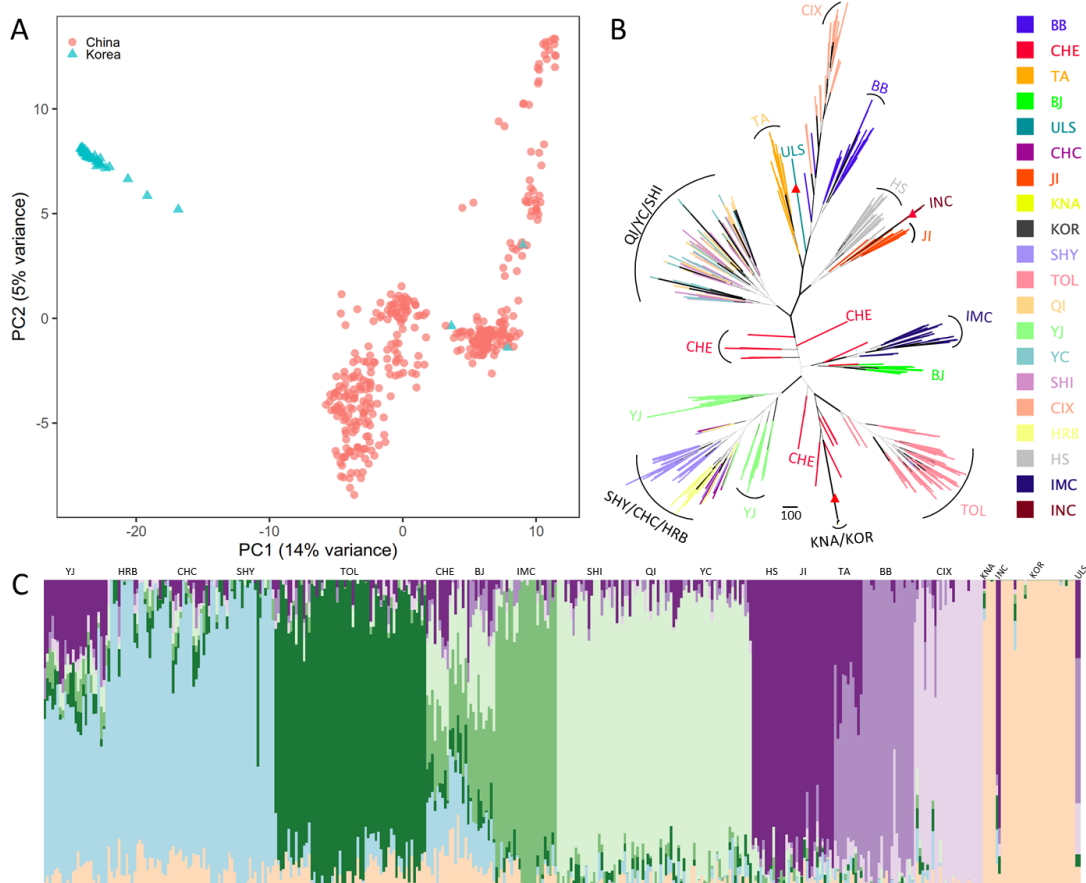

**Figure S12** Population genetic analyses of native ALBs in China and Korea (including related Korean samples). **A** PCA analysis. **B** Maximum likelihood phylogenetic tree in RAxML. Each branch represents a sample. The width of each branch corresponds with the bootstrap value. The scale bar shows a bootstrap value of 100. Branches with a red triangle point to Korean samples. **C** Bar plot of ancestry coefficients identified in LEA (optimal  $K=8$ ). Rotated labels indicate the Korean samples. A total of 6,102 SNPs were used in the analyses. For population codes, see Table 1. For relatedness estimates of KNA/KOR, see Table S12.
